# Supplementary material
Source: Springer Nature journal article supplement (https://www.springermedizin.de/resource/supplementary/13058_2012_3155_MOESM3_ESM.pdf/9703408)
Supplement: MOESM3 [file 9703408]

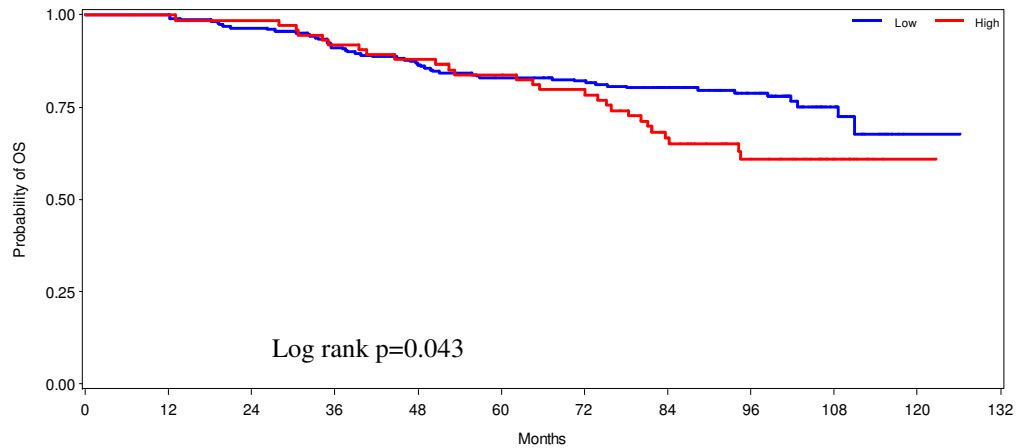

Patients at risk according to VEGFR1 mRNA expression

|      |     |     |     |     |     |     |     |     |    |    |   |
|------|-----|-----|-----|-----|-----|-----|-----|-----|----|----|---|
| Low  | 230 | 230 | 222 | 210 | 199 | 188 | 180 | 156 | 92 | 31 | 1 |
| High | 76  | 75  | 74  | 69  | 65  | 62  | 57  | 42  | 26 | 12 | 1 |

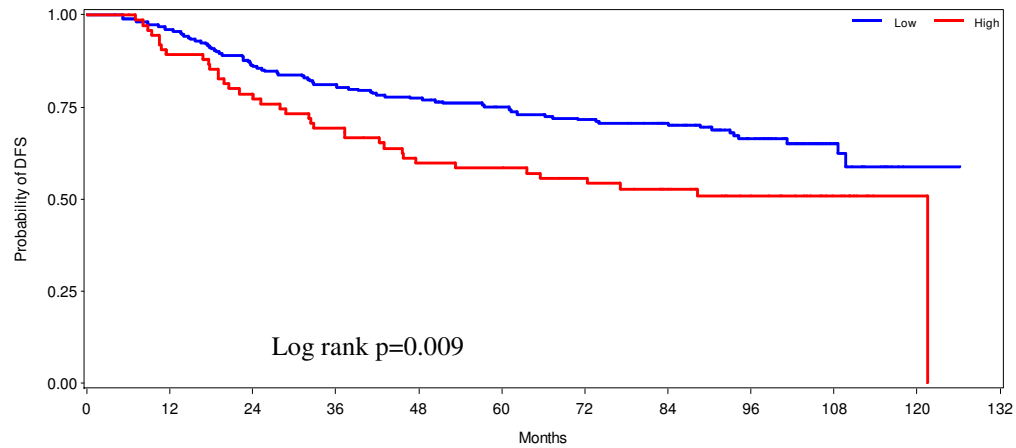

Patients at risk according to VEGFR1 mRNA expression

|      |     |     |     |     |     |     |     |     |    |    |   |
|------|-----|-----|-----|-----|-----|-----|-----|-----|----|----|---|
| Low  | 230 | 221 | 198 | 187 | 178 | 169 | 157 | 136 | 75 | 27 | 1 |
| High | 76  | 67  | 58  | 52  | 44  | 43  | 39  | 31  | 21 | 10 | 1 |
